# Supplementary material for: Thermal degradation of sucralose: a combination of analytical methods to determine stability and chlorinated byproducts
Source: PubMed Central journal article supplement (PMC4397539; doi:10.1038/srep09598), 2015-04-15
Supplement: srep09598-s2.pdf [file srep09598-s2.pdf]

Supplementary Material from the manuscript: “*Thermal degradation of sucralose: a combination of analytical methods to determine stability and chlorinated byproducts*” by Diogo N. de Oliveira, Maico de Menezes and Rodrigo R. Catharino.

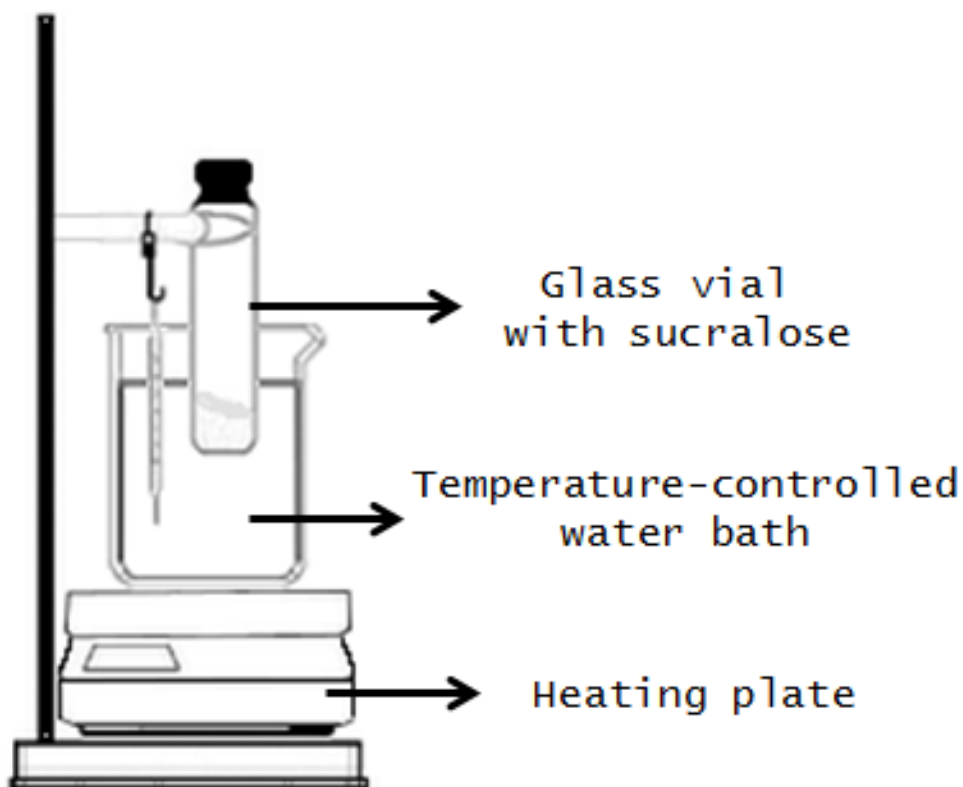

**Supplementary Figure 1 (Figure S1).** Schematic representation of the experimental setup for the thermal evaluation of sucralose, prior to HRMS analysis.

**Supplementary Movie 1.** Presents a short motion picture in high resolution of the meltdown process of sucralose using HSM.
